# Supplementary material for: Evolution of a ZW sex chromosome system in willows
Source: PubMed Central journal article supplement (PMC10628195; doi:10.1038/s41467-023-42880-5), 2023-11-06
Supplement: 41467_2023_42880_MOESM3_ESM.pdf [file 41467_2023_42880_MOESM3_ESM.pdf]

## Description of Additional Supplementary Files

### Supplementary Data 1

Description: Sex-associated positions of *S. exigua* when mapping to *S. exigua* and *S. purpurea* reference genome using genome-wide association study.

### Supplementary Data 2

Description: Contigs assembled to Chromosome 15 in *S. exigua* male (#SE967M) with Hi-C interacting map. "fragment\_#" refers to a contig with a substantial portion of the Nanopore assembly

### Supplementary Data 3

Description: Colinearity between Contig 511 of *S. exigua* and Chr15Z of *S. purpurea*.

### Supplementary Data 4

Description: Shared ancestry among Y, Z, and W implied by similarities on sex-associated alleles.

### Supplementary Data 5

Description: BLASTn output of *P. trichocarpa* RR17 sequence aligned to *S. purpurea* genome and *S. exigua* genome.

### Supplementary Data 6

Description: Positions of RR17 partial duplicates between *S. exigua* and *S. purpurea*
